# Supplementary material for: Systematic review on Endolimax nana: A less well studied intestinal ameba
Source: PubMed Central journal article supplement — Trop Parasitol. 2016 Jan-Jun;6(1):8–29. doi: 10.4103/2229-5070.175077 (PMC4778187; doi:10.4103/2229-5070.175077), 2016
Supplement: TP-6-8_Suppl1.pdf [file TP-6-8_Suppl1.pdf]

**Supplementary Table 1: Summary of prevalence articles used to estimate the global prevalence**

| Characteristics                                                            | Reference                                | Country, region and study group                                                                                                                                                       | % prevalence (no. of samples examined)                          | Methods                                                                                                                              |
|----------------------------------------------------------------------------|------------------------------------------|---------------------------------------------------------------------------------------------------------------------------------------------------------------------------------------|-----------------------------------------------------------------|--------------------------------------------------------------------------------------------------------------------------------------|
| Europe. From articles with healthy that are not older than 20 years        | Armengol <i>et al.</i> <sup>[1]</sup>    | Spain, Guadalquivir Valley, in the period 1994-1996, Children between 6 and 10 years old without symptoms from 20 villages                                                            | 1.6 (1,917)                                                     | Only specify coprological analysis and Graham method                                                                                 |
|                                                                            | Sagebiel <i>et al.</i> <sup>[2]</sup>    | Germany, Berlin, Kids in kindergarten, response rate 59 %                                                                                                                             | 1.5 (202)                                                       | Microscopically examination of stools does not specify concentration or staining methods                                             |
|                                                                            | Schlosser <i>et al.</i> <sup>[3]</sup>   | France, two groups: Group one sewage workers and group two food-handlers                                                                                                              | 2.1 (363) from group two                                        | Two concentration techniques merthiolate-iodine-formalin and Bailenger's method                                                      |
| Europe. From articles with patients that are older than 20 years           | Cerva and Kliment <sup>[4]</sup>         | Czech republic, Prague hospital, symptomatic patients with suspected intestinal parasitosis                                                                                           | 5.7 (10,418)                                                    | Faust's flotation-concentration method and wet smears stained with ferric haematoxylin after Heidenhain                              |
|                                                                            | Chin and Gerken <sup>[5]</sup>           | Great Britain, London, two groups: Group one homosexual attending the department of genitourinary medicine and group two controls medical students and laboratory technicians         | 21.7 (83) and 0 (43) from group one and two, respectively       | Formol-ether concentration                                                                                                           |
|                                                                            | Jokipii <i>et al.</i> <sup>[6]</sup>     | Finland, two groups: Group one healthy homosexual volunteers and group two healthy students, employees of a government office and hospital or laboratory personel serving as controls | 29.9 (190) and 1.2 (172) from group one and two, respectively   | Fresh stools: Diluted in warm Locke's solution and examined to detect trophozoites, iodine staining and formalin ether concentration |
|                                                                            | Portus and Prats <sup>[7]</sup>          | Spain, Barcelona, Stool samples from patients at hospital that was submitted for parasitic investigation                                                                              | 4.5 (650)                                                       | Sapero and Lawless (MIFD) and with the biphasic concentration method of Blagg <i>et al.</i> (MIFC)                                   |
|                                                                            | Schlosser <i>et al.</i> <sup>[3]</sup>   | France, two groups: Group one sewage workers and group two food-handlers                                                                                                              | 5.1 (126) from group one                                        | Two concentration techniques merthiolate-iodine-formalin and Bailenger's method                                                      |
|                                                                            | Soriano <i>et al.</i> <sup>[8]</sup>     | Saharawi children hosted in Spain                                                                                                                                                     | 8.9 (270)                                                       | Direct smear, Ritche concentration, Kinyoun's modified staining and trichrome staining                                               |
|                                                                            | Sterba <i>et al.</i> <sup>[9]</sup>      | Czechoslovakia, South Bohemia, agricultural workers, from 1975 to 1982                                                                                                                | 0.8 (1750)                                                      | NA                                                                                                                                   |
|                                                                            | Stürchler and Peter <sup>[10]</sup>      | Switzerland, Jura, schoolchildren 7 to 16 years                                                                                                                                       | 1.5 (134)                                                       | MIF-stool-samples                                                                                                                    |
|                                                                            | Characteristics                          | Reference                                                                                                                                                                             | Country, region and study group                                 | % prevalence (no. of samples examined)                                                                                               |
| North America. From articles with healthy that are not older than 20 years | Aimpun and Hsieh <sup>[11]</sup>         | Belize, Toledo district, 5 villages                                                                                                                                                   | 0.30 (672)                                                      | Formalin-ethyl-acetate concentration                                                                                                 |
|                                                                            | Faulkner <i>et al.</i> <sup>[12]</sup>   | Mexico, state of Tamaulipas, children                                                                                                                                                 | 5.3 (438)                                                       | Centrifugal flotation with saturated zinc sulfate and Sheathers sucrose solutions, fecal smears stained with trichrome               |
|                                                                            | Kurup and Hunjan <sup>[13]</sup>         | Saint Lucia, rural villages, school children aged 0-19 years, response rate 100 %                                                                                                     | 2.1 (554)                                                       | Parasep concentration and Kato-Katz                                                                                                  |
|                                                                            | Mendoza <i>et al.</i> <sup>[14]</sup>    | Cuba, San Miguel del Padron municipality, from children in day-care centers, three fecal samples from each                                                                            | 23.9 (456)                                                      | Direct and Ritchie's concentration                                                                                                   |
| North America. From articles with patients that are older than 20 years    | Acuna-Soto <i>et al.</i> <sup>[15]</sup> | Mexico, state of Chiapas, in the village of Navenchauc, random sample of 48 households                                                                                                | 50.2 (201)                                                      | Formalin-ethyl acetate sedimentation, lugol                                                                                          |
|                                                                            | Barrett <i>et al.</i> <sup>[16]</sup>    | Jamaica, children with HIV/AIDS in children's homes, two fecal examined from each child                                                                                               | 2.4 (42)                                                        | NA                                                                                                                                   |
|                                                                            | Bruckner <sup>[17]</sup>                 | USA, Los Angeles, patients, large part had Spanish surnames, two groups: Group one from Olive view Medical center and group two from Harbor General hospital                          | 13.0 (1,350) and 8.5 (493) from group one and two, respectively | Formail-ether concentration, Gomori's Trichrome                                                                                      |

Contd...

Supplementary Table 1: Contd...

| Characteristics | Reference                                             | Country, region and study group                                                                                                                  | % prevalence (no. of samples examined)                                         | Methods                                                                                                                                                                                                         |
|-----------------|-------------------------------------------------------|--------------------------------------------------------------------------------------------------------------------------------------------------|--------------------------------------------------------------------------------|-----------------------------------------------------------------------------------------------------------------------------------------------------------------------------------------------------------------|
|                 | Church <i>et al.</i> <sup>[18]</sup>                  | USA, Rocky Mountain region, patients experiencing gastrointestinal discomfort                                                                    | 1.5 (2,604)                                                                    | ParaPak, Formalin vial processed by filtered centrifugation stained with Lugol's iodine, confirmation stool in Zn-PVA vials stained with trichrome                                                              |
|                 | Church <i>et al.</i> <sup>[19]</sup>                  | Canada, Calgary, gay men with a majority HIV positive, it is not clear if it is the whole group that the prevalence is specified from            | 41 (58)                                                                        | Specified as standard methods                                                                                                                                                                                   |
|                 | Edouard <i>et al.</i> <sup>[20]</sup>                 | Martinique, samples examined at Fort de France University Hospital, patients, not unique samples                                                 | 1.25 (4,684)                                                                   | NA                                                                                                                                                                                                              |
|                 | Elliott <i>et al.</i> <sup>[21]</sup>                 | USA, Texas Gulf Coast, samples send for parasitological investigation                                                                            | 0.5 (1,626)                                                                    | Direct smear with saline and stained with D'Antoni's iodine, then by a smear from a concentrate prepared by the zinc-sulfate flotation method. Some samples also concentrated by formol-ether and ethyl-acetate |
|                 | Haddad and Agrawal <sup>[22]</sup>                    | USA, New Orleans, foreign seamen with adominal symptoms                                                                                          | 5 (99)                                                                         | NA                                                                                                                                                                                                              |
|                 | Kabani <i>et al.</i> <sup>[23]</sup>                  | Canada, Calgary, patients at childrens hospital                                                                                                  | 0.39 (1,532)                                                                   | Formalin-ethyl acetate concentration, hematoxylin/ Kinyoun stain and unstained                                                                                                                                  |
|                 | Kappus <i>et al.</i> <sup>[24]</sup>                  | USA, specimens examined for intestinal parasites by the state diagnostic laboratories in 1987                                                    | 4.2 (216,275)                                                                  | NA                                                                                                                                                                                                              |
|                 | Peters <i>et al.</i> <sup>[25]</sup>                  | USA, Chicago, 3 hospitals (1, 2 and 3) Patients from hospital 1 and 2 was primarily homosexual men. Symptomatic                                  | 39 (61), 31.6 (418) and 9 (418) attending hospital 1, 2 and 3, respectively    | Iodine stain direct and after formalin ethyl acetate concentration                                                                                                                                              |
|                 | Ramirez-Miranda <i>et al.</i> <sup>[26]</sup>         | Mexico, IBS patients                                                                                                                             | 3.2 (62)                                                                       | NA                                                                                                                                                                                                              |
|                 | Ribes <i>et al.</i> <sup>[27]</sup>                   | USA, Kentucky, patients suffering from diarrhea submitting samples for ova and parasite examination                                              | 0.95 (315)                                                                     | Formalin-ethyl acetate concentration, Kinyoun modified acid-fast- and trichrome stain                                                                                                                           |
|                 | Robinson <i>et al.</i> <sup>[28]</sup>                | Jamaica, healthy food handlers, two groups: Group one HTLV-1 positive and group two HTLV-1 negative                                              | 8.1 (99) and 8.8 (113) from group one and two, respectively                    | Ritchie formalin-ether concentration                                                                                                                                                                            |
|                 | Rojas <i>et al.</i> <sup>[29]</sup>                   | Cuba                                                                                                                                             | 10.3 (5,850)                                                                   | Direct, Willis' brine flotation and Kato-Katz thick smear                                                                                                                                                       |
|                 | Tsaihong <i>et al.</i> <sup>[30]</sup>                | USA, New York city, homosexual men with gastrointestinal illness, three groups: Group one AIDS patients, anti HIV positive and anti HIV negative | 5.2 (77), 15.3 (111) and 13.9 (72) from group one, two and three, respectively | Filtered and concentrated by centrifugation, saline wet mount, iodine wet mount and trichrome stain                                                                                                             |
|                 | Ungar <i>et al.</i> <sup>[31]</sup>                   | USA, Migrant farmworkers working on the Delmarva Peninsula                                                                                       | 6.8 (339)                                                                      | Formaldehyde-ether technique                                                                                                                                                                                    |
|                 | Wilkins and Horner <sup>[32]</sup>                    | USA Texas and Northern Mexico Chihuahua, clinical patients                                                                                       | 9.5 (273)                                                                      | NA                                                                                                                                                                                                              |
|                 | Yamamoto-Furusho and Torijano-Carrera <sup>[33]</sup> | Mexico, patients with ulcerative colitis                                                                                                         | 9 (215)                                                                        | Trichrome stain on polyvinyl alcohol preserved samples other formalin-ethyl acetate concentration examined no stain described                                                                                   |
| Characteristics | Reference                                             | Country, region and study group                                                                                                                  | % prevalence (no. of samples examined)                                         | Methods                                                                                                                                                                                                         |

Contd...

**Supplementary Table 1: Contd...**

| Characteristics                                                               | Reference                                       | Country, region and study group                                                                                                     | % prevalence (no. of samples examined) | Methods                                                                                                                                 |
|-------------------------------------------------------------------------------|-------------------------------------------------|-------------------------------------------------------------------------------------------------------------------------------------|----------------------------------------|-----------------------------------------------------------------------------------------------------------------------------------------|
| South America.<br>From articles with healthy that are not older than 20 years | Acurero <i>et al.</i> <sup>[34]</sup>           | Venezuela, State of Zulia, school children, one fecal sample from each                                                              | 19 (133)                               | Direct examination, formol-ether concentration and lugol                                                                                |
|                                                                               | Alves <i>et al.</i> <sup>[35]</sup>             | Brazil, Southeast Piaui state                                                                                                       | 13.6 (265)                             | Spontaneous sedimentation                                                                                                               |
|                                                                               | Assis <i>et al.</i> <sup>[36]</sup>             | Brazil, Maxakali indigenous villages in Minas Gerais, three stools collected on alternate days                                      | 10.3 (1497)                            | Formalin ethyl-acetate based concentration (TF-test® kit)                                                                               |
|                                                                               | Berbert-Ferreira and Costa-Cruz <sup>[37]</sup> | Brazil, State of Minas Gerais, Sucling babies (4-12 months), at nursery, 6 slides for each sample                                   | 1.76 (56)                              | Hoffman, Pons and Janer's method, lugol stain                                                                                           |
|                                                                               | Bermudez <i>et al.</i> <sup>[38]</sup>          | Colombia, Cali, children, at least two samples examined                                                                             | 60 (63)                                | Direct and after concentration does not specify which, Kato-Katz and Ziehl-Neelsen                                                      |
|                                                                               | Biscegli <i>et al.</i> <sup>[39]</sup>          | Brazil, Catanduva, children from day care center 7 – 78 months                                                                      | 2.3 (133)                              | NA                                                                                                                                      |
|                                                                               | Bracciaforte <i>et al.</i> <sup>[40]</sup>      | Argentina, Cordoba, children 6 months to 21 years old                                                                               | 7.3 (150)                              | Direct and after Willis and Ritchie concentration methods                                                                               |
|                                                                               | Castro <i>et al.</i> <sup>[41]</sup>            | Brazil, Sao Paulo, Children from a daycare center, two groups: Group one exhibiting diarrhea and group two non diarrheal            | 2 (50) from group two                  | Hoffman-Pons-Janer centrifugal flotation in zinc sulfate and Baermann-Moraes                                                            |
|                                                                               | Damazio <i>et al.</i> <sup>[42]</sup>           | Brazil, northern Espirito Santo, quilombola community                                                                               | 4.9 (82)                               | Spontaneous sedimentation, stained with Lugol and examined in triplicates                                                               |
|                                                                               | Flores <i>et al.</i> <sup>[43]</sup>            | Peru, communities located along the banks of Lake Titicaca, adults and children                                                     | 39.6 (91)                              | Direct examination, Kato technique, spontaneous sedimentation, Lumberas rapid sedimentation                                             |
|                                                                               | Franke <i>et al.</i> <sup>[44]</sup>            | Peru, Lima, children, two groups: Group one diagnosed with Tuberculosis and group two healthy                                       | 18.5 (189) from group two              | Direct smear and spontaneous sedimentation methods                                                                                      |
|                                                                               | Freites <i>et al.</i> <sup>[45]</sup>           | Venezuela, State of Zulia, food handlers                                                                                            | 41.2 (119)                             | Wet mount, Ritchie concentration, Modified Ziehl-Neelsen staining                                                                       |
|                                                                               | Ibanez <i>et al.</i> <sup>[46]</sup>            | Peru, Alto Maranon area in the amazon jungle, schoolchildren 6-15 years old                                                         | 23.9 (1049)                            | Direct microscopy and lugol stain, Telemán's and Kinnyoun's technique                                                                   |
|                                                                               | Kobayashii <i>et al.</i> <sup>[47]</sup>        | Brazil, Sao Paulo, inhabitants of five farms                                                                                        | 2.3 (222)                              | Formalin-ether concentration, Lugol stain                                                                                               |
|                                                                               | Korkes <i>et al.</i> <sup>[48]</sup>            | Brazil, Sao Paulo, children                                                                                                         | 20.8 (120)                             | Direct exam, Kato-Katz, Lutz-Hoffman spontaneous sedimentation, Rugai, Mattos and Brisola, thermal migration and Zinc sulfate flotation |
|                                                                               | Laugart <i>et al.</i> <sup>[49]</sup>           | Venezuela, Barinas state, children younger than 15 years old                                                                        | 38.9 (262)                             | Direct wet mount, Ritchie (formalin-ether) concentration and Kato Katz thick smear                                                      |
|                                                                               | Machado <i>et al.</i> <sup>[50]</sup>           | Brazil, Minas Gerais, children, Three fecal samples collected from each                                                             | 2.5 (160)                              | Modified Baermann, Lutz, lugols iodine stain of six slides for each sample and read by two investigators                                |
|                                                                               | Mercado <i>et al.</i> <sup>[51]</sup>           | Chile, Calbuco county, rural county, one sample per individual                                                                      | 16.4 (256)                             | NA                                                                                                                                      |
|                                                                               | Milano <i>et al.</i> <sup>[52]</sup>            | Argentina, children                                                                                                                 | 1.8 (113)                              | Modified Telemán, lugol staining                                                                                                        |
|                                                                               | Mora <i>et al.</i> <sup>[53]</sup>              | Venezuela, Sucre state, inhabitants of cities neighboring different rivers that was also investigated for the presence of parasites | 17.8 (426)                             | Direct, physiological saline solution and modified Ritchie concentration, stained with lugol, modified Kinnyoun and trichrome           |
| Moura <i>et al.</i> <sup>[54]</sup>                                           | Brazil, Sao Paulo, first grade school children  | 4.8 (146)                                                                                                                           | NA                                     |                                                                                                                                         |

Contd...

Supplementary Table 1: Contd...

| Characteristics                                                               | Reference                                      | Country, region and study group                                                                                          | % prevalence (no. of samples examined)                       | Methods                                                                                                                                      |
|-------------------------------------------------------------------------------|------------------------------------------------|--------------------------------------------------------------------------------------------------------------------------|--------------------------------------------------------------|----------------------------------------------------------------------------------------------------------------------------------------------|
|                                                                               | Munoz-Antoli <i>et al.</i> <sup>[55]</sup>     | Nicaragua, children                                                                                                      | 34.8 (382)                                                   | Formalin-ether concentration and examination using iodine wet mount and modified Ziehl-Neelsen                                               |
|                                                                               | Nascimento and Moitinho <sup>[56]</sup>        | Brazil, Pitanga city                                                                                                     | 33.7 (128)                                                   | Direct wet mount, zinc sulphate flotation, tube sedimentation, formalin-ether, stained by Kinyoun and iron hematoxylin                       |
|                                                                               | Rios <i>et al.</i> <sup>[57]</sup>             | Brazil, state of Amazonas, Lauarete district                                                                             | 10.3 (895)                                                   | NA                                                                                                                                           |
|                                                                               | Rivero-Rodriguez <i>et al.</i> <sup>[58]</sup> | Venezuela, Maracaibo, schoolchildren                                                                                     | 22.9 (349)                                                   | Fresh test and after formol-ether concentration                                                                                              |
|                                                                               | Saldiva <i>et al.</i> <sup>[59]</sup>          | Brazil, Sao Paolo, children 1-12 years from rural areas, Three fecal samples collected from each                         | 43 (520)                                                     | NA                                                                                                                                           |
|                                                                               | Santos and Merlini <sup>[60]</sup>             | Brazil, Parana state                                                                                                     | 6.5 (431)                                                    | Spontaneous sedimentation and centrifugal fecal flotation                                                                                    |
|                                                                               | Silva <i>et al.</i> <sup>[61]</sup>            | Brazil, Minas Gerais, horticulturists, three stool samples                                                               | 13 (30)                                                      | NA                                                                                                                                           |
|                                                                               | Tabares and Gonzalez 2008 <sup>[62]</sup>      | Columbia, Antioquia, Sabaneta, children under 12 years, examined up to three stool samples or less if positive           | 8.2 (97)                                                     | NA                                                                                                                                           |
|                                                                               | Takizawa <i>et al.</i> <sup>[63]</sup>         | Brazil, food handlers, 3 fecal samples collected over a 7 day period in same flask                                       | 25.9 (343)                                                   | Lutz, modified Ritchie and modified Ziehl-Neelsen staining                                                                                   |
|                                                                               | Tashimi <i>et al.</i> <sup>[64]</sup>          | Brazil, children                                                                                                         | 3.0 (101)                                                    | Faust concentration<br>RAPD agarose gel image analyzer                                                                                       |
| South America.<br>From articles with patients or that are older than 20 years | Amancio <i>et al.</i> <sup>[65]</sup>          | Brazil, Botucatu, HIV/ AIDS patients, three fecal samples collected on alternate days                                    | 1.9 (105)                                                    | Formalin ethyl-acetate based concentration (TF-test® kit) and stained with Lugol's solution                                                  |
|                                                                               | Bouree <i>et al.</i> <sup>[66]</sup>           | Peru, 4 native villages from the tribe Cashibo in Amazonia                                                               | 46 (165)                                                     | NA                                                                                                                                           |
|                                                                               | Cancrini <i>et al.</i> <sup>[67]</sup>         | Bolivia, Camiri, Gutierrez and Boyuibe areas, healthy individuals                                                        | 2.1 (381)                                                    | NA                                                                                                                                           |
|                                                                               | Carvalho-Costa <i>et al.</i> <sup>[68]</sup>   | Brazil, Rio de Janeiro, children with acute diarrhea                                                                     | 0.5 (213)                                                    | Not all methods performed on all samples but included, Direct examination and examination after Ritchie and safranin-methylene blue staining |
|                                                                               | Castro <i>et al.</i> <sup>[41]</sup>           | Brazil, Sao Paolo, Children from a daycare center, two groups: Group one exhibiting diarrhea and group two non diarrheal | 6 (50) from group one                                        | Hoffman-Pons-Janer centrifugal flotation in zinc sulfate and Baermann-Moraes                                                                 |
|                                                                               | Cho <i>et al.</i> <sup>[69]</sup>              | Ecuador, Guayas province, Palmar, mestizo population, collected from patients                                            | 5.5 (325)                                                    | Direct smear stained with lugol                                                                                                              |
|                                                                               | Cimerman <i>et al.</i> <sup>[70]</sup>         | Brazil, AIDS patients                                                                                                    | 3.5 (200)                                                    | Processed according to Hoffman, Faust and Rugai                                                                                              |
|                                                                               | Franke <i>et al.</i> <sup>[44]</sup>           | Peru, Lima, children, two groups: Group one diagnosed with Tuberculosis and group two healthy                            | 21.2 (189) from group one                                    | Direct smear and spontaneous sedimentation methods                                                                                           |
|                                                                               | Garibaldi <i>et al.</i> <sup>[71]</sup>        | Chile, Putaendo chronic patients from the psychiatric hospital                                                           | 50.5 (229)                                                   | NA                                                                                                                                           |
|                                                                               | Goldin <i>et al.</i> <sup>[72]</sup>           | Chile, Santiago nursery and primary school children                                                                      | 43 (722)                                                     | Formol-ether concentration                                                                                                                   |
|                                                                               | Guignard <i>et al.</i> <sup>[73]</sup>         | Argentina, orphaned and homeless children living in substitute homes                                                     | 34.6 (396)                                                   | Concentrated with Telean method, stained with Kinyoun's stain, Lugol and trichomic.                                                          |
|                                                                               | Kulik <i>et al.</i> <sup>[74]</sup>            | Brazil, two groups: Group one hemodialysis patients and group two attenders of local public health center                | 16.3 (86) and 1.4 (146) from group one and two, respectively | Faust, Lutz and Rugai methods                                                                                                                |

Contd...

Supplementary Table 1: Contd...

| Characteristics                                                   | Reference                                                                                        | Country, region and study group                                                                                                                                                            | % prevalence (no. of samples examined)                                                     | Methods                                                                                   |
|-------------------------------------------------------------------|--------------------------------------------------------------------------------------------------|--------------------------------------------------------------------------------------------------------------------------------------------------------------------------------------------|--------------------------------------------------------------------------------------------|-------------------------------------------------------------------------------------------|
|                                                                   | Maia <i>et al.</i> <sup>[75]</sup>                                                               | Brazil, Amazonas state, children 0-10 years presenting at outpatient clinics in Manaus                                                                                                     | 17.9 (451)                                                                                 | NA                                                                                        |
|                                                                   | Merlano <i>et al.</i> <sup>[76]</sup>                                                            | Columbia, Atlantico, patients                                                                                                                                                              | 20.3 (423)                                                                                 | NaCl parasite-concentration compared with wet mount                                       |
|                                                                   | Moura <i>et al.</i> <sup>[77]</sup>                                                              | Brazil, Rio de Janeiro, aids patients                                                                                                                                                      | 18.2 (95)                                                                                  | Four methods: Faust, Kato-Katz, Baermann-Moraes and Baxby                                 |
|                                                                   | Navarrete and Torres <sup>[78]</sup>                                                             | Chile, province of Valdivia, coastal area, primary school children                                                                                                                         | 34.4 (219)                                                                                 | NA                                                                                        |
|                                                                   | Rivero-Rodriguez <i>et al.</i> <sup>[79]</sup>                                                   | Venezuela, patients with HIV/ AIDS                                                                                                                                                         | 3.9 (56)                                                                                   | Direct, formol-ether, Kinyoun- and fast Gram-Chromotrope stain                            |
|                                                                   | Silva <i>et al.</i> <sup>[80]</sup>                                                              | Brazil, Sao Paulo, neoplastic patients                                                                                                                                                     | 3.3 (30)                                                                                   | Lutz, and Rugai, in triplicate                                                            |
|                                                                   | Torres <i>et al.</i> <sup>[81]</sup>                                                             | Chile, Valdivia River Basin                                                                                                                                                                | 19.7 (970)                                                                                 | NA                                                                                        |
|                                                                   | Urbina <i>et al.</i> <sup>[82]</sup>                                                             | Columbia, Cartagena and Sincelejo, children and infants with acute diarrhea                                                                                                                | 3.2 (253)                                                                                  | Direct wet mount                                                                          |
|                                                                   | Valles <i>et al.</i> <sup>[83]</sup>                                                             | Venezuela, patients                                                                                                                                                                        | 9.1 (3060)                                                                                 | Direct examination with saline and lugol and Kato's concentration technique               |
|                                                                   | Vidal <i>et al.</i> <sup>[84]</sup>                                                              | Chile, Talca, preschool and school children, 6 periods divided into 1980-84, 1985-89, 1990-94, 1995-99, 2000-04 and 2005-07                                                                | 26.3 (10,205), 19.7 (12,010), 18.0 (11,680), 16.7 (11,810), 8.6 (12,050) and 10.1 (10,387) | NA                                                                                        |
| Characteristics                                                   | Reference                                                                                        | Country, region and study group                                                                                                                                                            | % prevalence (no. of samples examined)                                                     | Methods                                                                                   |
| Asia. From articles with healthy that are not older than 20 years | Abdel-Dayem <i>et al.</i> <sup>[85]</sup>                                                        | Jordan, food handlers working at luxurious hotels in the dead sea area                                                                                                                     | 0.11 (901)                                                                                 | Wet mount preparations with physiological saline and iodine. Formalin-ether concentration |
|                                                                   | Akdemir and Helvacı <sup>[86]</sup>                                                              | Turkey, older than 15 years                                                                                                                                                                | 0.44 (675)                                                                                 | Native and formalin-ethyl acetate sedimentation                                           |
|                                                                   | Amin <sup>[87]</sup>                                                                             | Saudi Arabia, Jeddah, healthy food handlers                                                                                                                                                | 0,4 (250)                                                                                  | NA                                                                                        |
|                                                                   | Azian <i>et al.</i> <sup>[88]</sup>                                                              | Malaysia, Pahang, aborigine community                                                                                                                                                      | 10.8 (130)                                                                                 | Samples fixed in polyvinyl alcohol, Trichrome staining                                    |
|                                                                   | Ben-Shimol <i>et al.</i> <sup>[89]</sup>                                                         | Israel, Southern Israel, children, samples collected over 5 year period, not unique samples, but did not include samples collected within 30 days of last sample                           | 0.0065 (45,978)                                                                            | Sedimentation based concentration. Stained with and without lugol                         |
|                                                                   | Börekci and Uzel <sup>[90]</sup>                                                                 | Turkey, Mersin, Children living in social service child care centre                                                                                                                        | 2.8 (106)                                                                                  | Formol-ether-acetate, native lugol, Kinyoun's acid fast staining                          |
|                                                                   | Cengiz <i>et al.</i> <sup>[91]</sup>                                                             | Turkey, Van, Children attending primary school                                                                                                                                             | 0.3 (395)                                                                                  | Native-lugol, flotation and trichrome staining                                            |
|                                                                   | Cengiz <i>et al.</i> <sup>[92]</sup>                                                             | Turkey, Van, Children attending primary school                                                                                                                                             | 1.8 (2,975)                                                                                | Native-lugol, flotation and trichrome staining                                            |
|                                                                   | Danchaivijitr <i>et al.</i> <sup>[93]</sup> included 1 <sup>st</sup> examination in calculations | Thailand, food handlers working at hospital, examined twice: 1 <sup>st</sup> time in 2002 and 2 <sup>nd</sup> time in 2004 after education on hand hygiene and treatment of positive cases | 4.1 (121) and 1.6 (129) from 1 <sup>st</sup> and 2 <sup>nd</sup> examination, respectively | Identified by microscopy (does not specify how)                                           |
|                                                                   | Daryani <i>et al.</i> <sup>[94]</sup>                                                            | Iran, Sari, schoolchildren                                                                                                                                                                 | 1.5 (1,100) added both mono- and polyparasitism where <i>E. nana</i> is included           | Direct and after formalin-ether concentration staining with Ziehl-Neelsen and trichrome   |
|                                                                   | Degerli <i>et al.</i> <sup>[95]</sup> included 1 <sup>st</sup> examination in calculations       | Turkey, Alahaci village primary school children in Sivas, examined twice at six months intervals                                                                                           | 1 <sup>st</sup> examination 4.2 (189) and 2 <sup>nd</sup> examination 0 (175)              | NA                                                                                        |

Contd...

**Supplementary Table 1: Contd...**

| Characteristics | Reference                                     | Country, region and study group                                                                                                                                                  | % prevalence (no. of samples examined)                                                   | Methods                                                                                                                 |
|-----------------|-----------------------------------------------|----------------------------------------------------------------------------------------------------------------------------------------------------------------------------------|------------------------------------------------------------------------------------------|-------------------------------------------------------------------------------------------------------------------------|
|                 | Guducuoglu <i>et al.</i> <sup>[96]</sup>      | Turkey, Van province, 1 <sup>st</sup> and 2 <sup>nd</sup> grade students                                                                                                         | 0.5 (195)                                                                                | NA                                                                                                                      |
|                 | Hamamci <i>et al.</i> <sup>[97]</sup>         | Turkey, Kayseri-Hacilar region, Children attending primary school                                                                                                                | 1.8 (328)                                                                                | Native-lugol                                                                                                            |
|                 | Kia <i>et al.</i> <sup>[98]</sup>             | Iran, Mazandaran province, rural inhabitants, collected randomly                                                                                                                 | 0.7 (855)                                                                                | Formalin-ethyl-acetate concentration                                                                                    |
|                 | Kitvatanachai and Rhongbutri <sup>[99]</sup>  | Thailand, Lak Hok subdistrict, government schools aged 7-12 years, fecal samples requested from 1253 students received 202                                                       | 7.9 (202)                                                                                | Direct examination and after modified formalin-ether concentration technique                                            |
|                 | Koshak and Zakai <sup>[100]</sup>             | Saudi-Arabia, pre-employment workers and their families                                                                                                                          | 16.4 (292)                                                                               | Formalin ether, iodine stain                                                                                            |
|                 | Kurtoglu <i>et al.</i> <sup>[101]</sup>       | Turkey, Van region, food sector workers                                                                                                                                          | 0.27 (739)                                                                               | NA                                                                                                                      |
|                 | Lee <i>et al.</i> <sup>[102]</sup>            | Philippines, Legaspi city, children and adolescents                                                                                                                              | 9.4 (64)                                                                                 | Formalin-ether sedimentation                                                                                            |
|                 | Lu and Sung <sup>[103]</sup>                  | Immigrant population in northeastern Taiwan tested for residence approval, from four countries: China, Indonesia, Vietnam and The Philippines                                    | 0.7 (144), 1.4 (276), 0.9 (114) and 1.3 (396) from the different countries, respectively | Merthiolate-iodine-formaldehyde concentration and direct wet-mount                                                      |
|                 | Ngrenngarmert <i>et al.</i> <sup>[104]</sup>  | Thailand, Nakhon Prathom province, school children 7-12 years                                                                                                                    | 1.0 (1,920)                                                                              | Formalin-ethyl acetate                                                                                                  |
|                 | Oyofu <i>et al.</i> <sup>[105]</sup>          | Indonesia, Jakarta, two groups: Group one patients with diarrhea and group two controls not having diarrhea                                                                      | 0 (51) from group two                                                                    | Melvin and Brookes method                                                                                               |
|                 | Prownebon <i>et al.</i> <sup>[106]</sup>      | Thailand, Pathum Thani province, children 1-6 years old, two groups: Group one children at orphanage and group two hill-tribe children                                           | 2.2 (137) and 0.7 (145) from group one and two, respectively                             | Simple smear and formalin-ether concentration                                                                           |
|                 | Sagnuankiat <i>et al.</i> <sup>[107]</sup>    | Thailand, Samut Sakhon province, immigrant children at daycare centers                                                                                                           | 3.5 (372)                                                                                | Direct smear with normal saline 1 % iodine solution                                                                     |
|                 | Saksirisampant <i>et al.</i> <sup>[108]</sup> | Thailand, Pathum Thani province, children in an orphanage (0-7 years)                                                                                                            | 3.7 (106)                                                                                | Simple smear preparation and formalin-ether concentration                                                               |
|                 | Saksirisampant <i>et al.</i> <sup>[109]</sup> | Thailand, Chiang Mai Province, school children 3-19 from the Karen Hill-Tribe                                                                                                    | 4.8 (542)                                                                                | Formalin-ether concentration                                                                                            |
|                 | Saksirisampant <i>et al.</i> <sup>[110]</sup> | Thailand, central region, children attending primary school 3-12 years                                                                                                           | 0.48 (1,037)                                                                             | Formalin-ether concentration                                                                                            |
|                 | Tungtrongchitr <i>et al.</i> <sup>[111]</sup> | Thailand, two groups: group one IBS patients and group two controls without IBS                                                                                                  | 0 (25) from group two                                                                    | Direct smear with saline solution and iodine, trichrome, modified trichrome and acid-fast staining                      |
|                 | Tungtrongchitr <i>et al.</i> <sup>[112]</sup> | Thailand, Ubon Ratchathani Province, rural communities                                                                                                                           | 0.2 (479)                                                                                | Direct smear and modified Kato thick smear                                                                              |
|                 | Waikagul <i>et al.</i> <sup>[113]</sup>       | Thailand, Nan-province, children from primary schools                                                                                                                            | 2.5 (1,010)                                                                              | Formalin-ether sedimentation                                                                                            |
|                 | Warunee <i>et al.</i> <sup>[114]</sup>        | Thailand, Nakhon Prathom province, schoolchildren 7-12 years old                                                                                                                 | 1.0 (1,920)                                                                              | Formalin-ethyl acetate concentration                                                                                    |
|                 | Wilairatana <i>et al.</i> <sup>[115]</sup>    | Thailand, laborers going abroad for work, asymptomatic                                                                                                                           | 2.5 (362)                                                                                | Formalin-ether concentration                                                                                            |
|                 | Wongjindanon <i>et al.</i> <sup>[116]</sup>   | Thailand, two groups: group one volunteers any age from Surin province (rural) and group two healthy schoolchildren between 5-7 years old from Samut Sakhon province (sub-urban) | 0 (3,358) and 0.76 (656) from group one and two, respectively                            | Group one simple smear and group two saline sedimentation, stained with iodine, all samples were examined in duplicates |
|                 | Yaicharoen <i>et al.</i> <sup>[117]</sup>     | Thailand, Bangkok, asymptomatic participants, two groups: Group one participants examined in 1999 and group two participants examined in 2004                                    | 0.27 (1,147) and 0.65 (1,083) from group one and two, respectively                       | Direct smear                                                                                                            |

Contd...



Supplementary Table 1: Contd...

| Characteristics                                                   | Reference                                                                                                                                                                                                                                  | Country, region and study group                                                                           | % prevalence (no. of samples examined)                                                                                                       | Methods                                                                                              |
|-------------------------------------------------------------------|--------------------------------------------------------------------------------------------------------------------------------------------------------------------------------------------------------------------------------------------|-----------------------------------------------------------------------------------------------------------|----------------------------------------------------------------------------------------------------------------------------------------------|------------------------------------------------------------------------------------------------------|
|                                                                   | Yaicharoen <i>et al.</i> <sup>[118]</sup>                                                                                                                                                                                                  | Thailand, Nakhon Pathom province, children attending public schools                                       | 2.2 (814)                                                                                                                                    | Cultured in Jones medium (48 h), formalin ethyl acetate concentration                                |
| Asia. From articles with patients or that are older than 20 years | Akao <i>et al.</i> <sup>[119]</sup>                                                                                                                                                                                                        | Japan, Ishikawa, foreign workers from Indonesia and the Philippines                                       | 5.6 (198)                                                                                                                                    | NA                                                                                                   |
|                                                                   | Akhlaghi <i>et al.</i> <sup>[120]</sup>                                                                                                                                                                                                    | Iran, patients referred to three hospitals in Tehran during, random selection of 1000 samples             | 3.2 (1,000)                                                                                                                                  | Direct smear, formol-ethyl acetate, Ziehl-Neelsen                                                    |
|                                                                   | Arslan <i>et al.</i> <sup>[121]</sup>                                                                                                                                                                                                      | Turkey, 2-6 years old children with gastrointestinal symptoms                                             | 4.3 (138)                                                                                                                                    | Centrifugal formalin ether, zinc-sulphate flotation and modified acid fast techniques, Lugols stain  |
|                                                                   | Azami <i>et al.</i> <sup>[122]</sup>                                                                                                                                                                                                       | Iran, renal transplant recipients                                                                         | 8.7 (150)                                                                                                                                    | Direct smear, formalin-ether sedimentation, Sheather's flotation and modified Ziehl-Neelsen staining |
|                                                                   | Carney <i>et al.</i> <sup>[123]</sup>                                                                                                                                                                                                      | Indonesia, Central and South Sulawesi, remote areas                                                       | 1 (1,156)                                                                                                                                    | NA                                                                                                   |
|                                                                   | Carney <i>et al.</i> <sup>[124]</sup>                                                                                                                                                                                                      | Philippines, North Bohol, rural areas, volunteers                                                         | 7.1 (1,694)                                                                                                                                  | Direct and after formalin-ether concentration                                                        |
|                                                                   | Carney <i>et al.</i> <sup>[125]</sup>                                                                                                                                                                                                      | Philippines, Bukidnon province, volunteers                                                                | 3.9 (831)                                                                                                                                    | Direct and after formalin-ether concentration                                                        |
|                                                                   | Carney <i>et al.</i> <sup>[126]</sup>                                                                                                                                                                                                      | Philippines, Oriental Mindoro, volunteers                                                                 | 4.1 (1,058)                                                                                                                                  | Direct and after formalin-ether concentration                                                        |
|                                                                   | Chiu <i>et al.</i> <sup>[127]</sup>                                                                                                                                                                                                        | Taiwan, Nantou county, Village suspected of <i>Taenia solium</i> outbreak                                 | 2.6 (417)                                                                                                                                    | Direct smear and formalin-ether sedimentation                                                        |
|                                                                   | Choi <i>et al.</i> <sup>[128]</sup>                                                                                                                                                                                                        | Korea, clinical samples                                                                                   | 0.26 (782)                                                                                                                                   | Formalin-ether concentration                                                                         |
|                                                                   | Kim <i>et al.</i> <sup>[129]</sup>                                                                                                                                                                                                         | South Korea, inhabitants in the upper stream of Taechong Dam, located on the Kungang river                | 0.3 (743)                                                                                                                                    | Formalin-ether concentration                                                                         |
|                                                                   | Cross <i>et al.</i> <sup>[130]</sup>                                                                                                                                                                                                       | Borneo, West Kalimantan, 8 villages, based on number of stool samples examined                            | 6 (2,101)                                                                                                                                    | NA                                                                                                   |
|                                                                   | Cross <i>et al.</i> <sup>[131]</sup>                                                                                                                                                                                                       | Indonesia, North Sumatra, 5 villages, based on number of stool samples examined                           | 8 (2,066)                                                                                                                                    | NA                                                                                                   |
|                                                                   | Cross <i>et al.</i> <sup>[132]</sup>                                                                                                                                                                                                       | Philippines, North Samar Province, persons living in 8 barrios, based on number of stool samples examined | 6 (1,394)                                                                                                                                    | NA                                                                                                   |
|                                                                   | Cross <i>et al.</i> <sup>[133]</sup>                                                                                                                                                                                                       | Indonesia, Irian Jaya (West Irian), based on number of stool samples examined                             | 8 (114)                                                                                                                                      | NA                                                                                                   |
| Dogan <i>et al.</i> <sup>[134]</sup>                              | Turkey, children with diarrhea                                                                                                                                                                                                             | 2.2 (225)                                                                                                 | Formalin-ether sedimentation                                                                                                                 |                                                                                                      |
| Goo <i>et al.</i> <sup>[135]</sup>                                | Korea, Yondo, remote island, single stool samples                                                                                                                                                                                          | 0.8 (1,011)                                                                                               | Formalin-ether centrifugal sedimentation                                                                                                     |                                                                                                      |
| Hong <i>et al.</i> <sup>[136]</sup>                               | Korea, Jeonlanam Do province, 4 urban and 7 rural areas                                                                                                                                                                                    | 2.5 (4,116)                                                                                               | Formalin-ether sedimentation, Lugol's iodine stain                                                                                           |                                                                                                      |
| Hong <sup>[137]</sup>                                             | Korea, soldiers, from 1983-1985                                                                                                                                                                                                            | 1.7 (2,643)                                                                                               | Formalin-ether concentration                                                                                                                 |                                                                                                      |
| Iqbal <i>et al.</i> <sup>[138]</sup>                              | Kuwait, patients in two groups: group one with gastrointestinal symptoms and group two with complaints other than gastrointestinal symptoms                                                                                                | 15 (3,549) and 0.2 (500) from group one and two, respectively                                             | A single fecal sample concentrated with formalin based method (EPC concentrator). Wet examinations with physiological saline and with iodine |                                                                                                      |
| Kim <i>et al.</i> <sup>[139]</sup>                                | Korea and Vietnam, single specimens examined twice, four groups: Group one Vietnamese, group two US armed forces, group three Korean troops in South Vietnam and group four Korean home patients at 1 <sup>st</sup> army hospital in Korea | 0.14 (717), 6.1 (1,933), 3.9 (433) and 1.8 (114) from group one, two, three and four, respectively        | Iodine stain, different concentration techniques                                                                                             |                                                                                                      |
| Kim <i>et al.</i> <sup>[140]</sup>                                | Korea                                                                                                                                                                                                                                      | 10.0 (2250)                                                                                               | Direct, zinc sulfate flotation and formalin-ether sedimentation                                                                              |                                                                                                      |
| Kim <i>et al.</i> <sup>[141]</sup>                                | Korea, Gyeong-gi Do and Jeonra Bug Do                                                                                                                                                                                                      | 2.7 (2735)                                                                                                | Formalin-ether sedimentation                                                                                                                 |                                                                                                      |

Contd...

Supplementary Table 1: Contd...

| Characteristics | Reference                                   | Country, region and study group                                                                                | % prevalence (no. of samples examined)                                                                                                                                                  | Methods                                                                                                                     |
|-----------------|---------------------------------------------|----------------------------------------------------------------------------------------------------------------|-----------------------------------------------------------------------------------------------------------------------------------------------------------------------------------------|-----------------------------------------------------------------------------------------------------------------------------|
|                 | Kim <i>et al.</i> <sup>[142]</sup>          | Korea, patients attending Samsung medical center, 7 years 2000-2006                                            | 1.2 (12,163), 1.2 (14,194), 1.8 (12,377), 2.0 (9,945), 2.2 (9,685), 1.7 (10,110) and 2.1 (9,599) from the consecutive years, respectively                                               | NA                                                                                                                          |
|                 | Kim <i>et al.</i> <sup>[143]</sup>          | Korea, all samples submitted to Samsung medical center for parasitological investigation, 10 years 2003 - 2012 | 2.6 (26,452), 2.1 (43,603), 1.4 (44,514), 1.5 (43,347), 1.4 (43,921), 1.5 (56,849), 1.5 (57,607), 1.0 (56,301), 1.0 (57,272) and 0.97 (56,946) from the consecutive years, respectively | Formalin-ether sedimentation                                                                                                |
|                 | Lee <i>et al.</i> <sup>[144]</sup>          | Southeast asia, aircrew personal, mainly males                                                                 | 2.6 (557)                                                                                                                                                                               | NA                                                                                                                          |
|                 | Lee <i>et al.</i> <sup>[145]</sup>          | Korea, Seoul Paik hospital, 9 years 1984 - 1992                                                                | 0.8 (5,353), 0.5 (4,919), 0.4 (4,795), 0.6 (5,458), 0.9 (5,795), 0.7 (6,895), 0.6 (6,615), 0.7 (7,200) and 1.7 (5,522) from the consecutive years, respectively                         | Formalin-ether sedimentation and/or direct smear                                                                            |
|                 | Lee <i>et al.</i> <sup>[146]</sup>          | Korea, handicapped at an institution                                                                           | 21.4 (112)                                                                                                                                                                              | Formalin-ether sedimentation                                                                                                |
|                 | Mangali <i>et al.</i> <sup>[147]</sup>      | Indonesia, south Sulawesi, Campalagian district, 3 coastal and 2 inland villages                               | 12.5 (380)                                                                                                                                                                              | Formalin ether concentration                                                                                                |
|                 | Nasiri <i>et al.</i> <sup>[148]</sup>       | Iran, Karaj, refugees                                                                                          | 0.05 (13,915)                                                                                                                                                                           | Formalin-ethyl acetate sedimentation and trichrome stain                                                                    |
|                 | Niyyati <i>et al.</i> <sup>[149]</sup>      | Iran, Tehran, people referred to Kashani hospital                                                              | 0.97 (205)                                                                                                                                                                              | Direct examination and formalin-ether concentration                                                                         |
|                 | Oyoyo <i>et al.</i> <sup>[105]</sup>        | Indonesia, Jakarta, two groups: Group one patients with diarrhea and group two controls not having diarrhea    | 0.5 (389) from group one                                                                                                                                                                | Melvin and Brookes method                                                                                                   |
|                 | Purnomo <i>et al.</i> <sup>[150]</sup>      | Indonesia, West Flores, Karakuak                                                                               | 1 (198)                                                                                                                                                                                 | NA                                                                                                                          |
|                 | Sahin <i>et al.</i> <sup>[151]</sup>        | Turkey, wrestlers of the national team at training camp in Kayseri, majority had gastrointestinal complaints   | 11.1 (18)                                                                                                                                                                               | NA                                                                                                                          |
|                 | Sharif <i>et al.</i> <sup>[152]</sup>       | Iran, Mazandaran province, children who are intellectually disabled, Three fecal samples collected             | 3.9 (362)                                                                                                                                                                               | Direct wet mount, formalin-ether concentration, Ziehl-Neelsen and trichrome staining                                        |
|                 | Shokri <i>et al.</i> <sup>[153]</sup>       | Iran, mentally retarded                                                                                        | 2.3 (133)                                                                                                                                                                               | Direct smear, formalin-ether concentration and stained with Trichrome and Ziehl-Neelsen                                     |
|                 | Stafford and Joesoef <sup>[154]</sup>       | Indonesia, Sumatra, Aceh province, Bireuen and Takengon, volunteers                                            | 7 (348)                                                                                                                                                                                 | Direct and formalin-ether concentration                                                                                     |
|                 | Stafford <i>et al.</i> <sup>[155]</sup>     | Indonesia, Gorontalo North Sulawesi, indigenous mountain people primarily moslems                              | 5 (156)                                                                                                                                                                                 | Direct and formalin-ether concentration                                                                                     |
|                 | Stafford <i>et al.</i> <sup>[156]</sup>     | Indonesia, Bali                                                                                                | 7 (270)                                                                                                                                                                                 | Direct and formalin-ether concentration                                                                                     |
|                 | Subbannayya <i>et al.</i> <sup>[157]</sup>  | India, Karnataka, south Kanara district, apparently healthy people                                             | 0.10 (1,020)                                                                                                                                                                            | Direct smear with saline and D'Antoni's iodine, Zinc sulfate concentration and culture in modified Boek and Drbolhav medium |
|                 | Supanaranond <i>et al.</i> <sup>[158]</sup> | Thailand, Volunteers in cholera vaccine trial                                                                  | 3.5 (171)                                                                                                                                                                               | NA                                                                                                                          |

Contd...



Supplementary Table 1: Contd...

| Characteristics                                                     | Reference                                                                                   | Country, region and study group                                                                                                                                                                                                                   | % prevalence (no. of samples examined)                                                                | Methods                                                                                                                                                                                |
|---------------------------------------------------------------------|---------------------------------------------------------------------------------------------|---------------------------------------------------------------------------------------------------------------------------------------------------------------------------------------------------------------------------------------------------|-------------------------------------------------------------------------------------------------------|----------------------------------------------------------------------------------------------------------------------------------------------------------------------------------------|
|                                                                     | Tanyuksel <i>et al.</i> <sup>[159]</sup>                                                    | Turkey, patients with symptomatic diarrhea/dysentery                                                                                                                                                                                              | 2.3 (380)                                                                                             | Fresh, lugol and trichrome stain                                                                                                                                                       |
|                                                                     | Tungtrongchitr <i>et al.</i> <sup>[111]</sup>                                               | Thailand, two groups: group one IBS patients and group two controls without IBS                                                                                                                                                                   | 5.1 (59) from group one                                                                               | Direct smear with saline solution and iodine, trichrome, modified trichrome and acid-fast staining                                                                                     |
|                                                                     | Yaman <i>et al.</i> <sup>[160]</sup>                                                        | Turkey, samples send to parasitological laboratory at Erciyes University between 2005-2008                                                                                                                                                        | 1.26 (28911)                                                                                          | Flotation/sedimentation methods, native-Lugol stain                                                                                                                                    |
|                                                                     | Yazar <i>et al.</i> <sup>[161]</sup>                                                        | Turkey, samples send to parasitological laboratory at Erciyes University between 2000-2004                                                                                                                                                        | 1.4 (34883)                                                                                           | Flotation/sedimentation methods, native-Lugol stain                                                                                                                                    |
|                                                                     | Yosefi <i>et al.</i> <sup>[162]</sup>                                                       | Iran, Ahvaz, AIDS patients                                                                                                                                                                                                                        | 5 (100)                                                                                               | Merthiolate-iodine-formaldehyde, trichrome and Ziehl-Neelsen staining                                                                                                                  |
| Characteristics                                                     | Reference                                                                                   | Country, region and study group                                                                                                                                                                                                                   | % prevalence (no. of samples examined)                                                                | Methods                                                                                                                                                                                |
| Africa. From articles with healthy that are not older than 20 years | Graczyk <i>et al.</i> <sup>[163]</sup>                                                      | Zambia, school-age children, half of the stools diarrheic                                                                                                                                                                                         | 64.3 (93)                                                                                             | Direct wet smear, Sheather's sugar flotation and stained with Lugols iodine                                                                                                            |
|                                                                     | Ikeh <i>et al.</i> <sup>[164]</sup>                                                         | Nigeria, single stool specimens, Two groups: one volunteers in rural village and two randomly selected urban dwellers. Study groups unique in being adults where samples are not sent to diagnostic facilities due to diarrhea                    | 16.2 (111) and 18.3 (93) from group one and two, respectively                                         | Formol-ether and modified Ziehl-Neelsen technique                                                                                                                                      |
|                                                                     | Ouattara <i>et al.</i> <sup>[165]</sup>                                                     | Western Cote d'Ivoire, rural area, pupils 6-16 years at 57 different schools                                                                                                                                                                      | 83.8 (4,466)                                                                                          | Formol-ether concentration                                                                                                                                                             |
| Africa. From articles with patients or that are older than 20 years | Raso <i>et al.</i> <sup>[166]</sup>                                                         | Cote d'Ivoire, schoolchildren                                                                                                                                                                                                                     | 82.6 (4,042)                                                                                          | Formol-ether concentration                                                                                                                                                             |
|                                                                     | Chunge <i>et al.</i> <sup>[167]</sup> , includes only 1 <sup>st</sup> study in calculations | Kenya, Kiambu District, Nderu, rural community, 4 cross-sectional surveys, 2 <sup>nd</sup> , 3 <sup>rd</sup> and 4 <sup>th</sup> based on selected group from the 1 <sup>st</sup> study. Endolimax was more commonly encountered in formed stools | 30.4 (1,129), 21.4 (388), 28.9 (401) and 31.1 (363) from study one, two, three and four, respectively | Direct smear in saline and iodine and a modified formol ether concentration method, examined at 10X and 400X magnification                                                             |
|                                                                     | El Shazly <i>et al.</i> <sup>[168]</sup>                                                    | Egypt, patients                                                                                                                                                                                                                                   | 6.9 (3,180)                                                                                           | Direct wet smear, formol-ether concentration, modified Sheather's sugar flotation, Potassium hydroxide concentration. Gomori's Trichrome stain, and modified Kinyoun's acid-fast stain |
|                                                                     | Goldsmid <i>et al.</i> <sup>[169]</sup>                                                     | Rhodesia (Zambia and Zimbabwe), institution with cases of amoebic dysentery had been recorded                                                                                                                                                     | 12.8 (180)                                                                                            | Water centrifugation (strained stool emulsified in tap water) and formol-ether concentration                                                                                           |
|                                                                     | Hunter <i>et al.</i> <sup>[170]</sup>                                                       | Zambia, two groups, one patients with AIDS and two controls adults recruited from a township near Lusaka (only 1 complaining of diarrhea)                                                                                                         | 11 (90) and 19 (105) from group one and two, respectively                                             | Formol-ether concentration                                                                                                                                                             |
|                                                                     | Kassem <i>et al.</i> <sup>[171]</sup>                                                       | Libya, Sirt, children and neonates admitted to Ibn-Sina hospital, examined 2001-2002                                                                                                                                                              | 13.7 (350)                                                                                            | NA                                                                                                                                                                                     |
|                                                                     | Ogunba <sup>[172]</sup>                                                                     | Nigeria, Ibadan, two groups: one patients at University College Hospital in Ibadan collected from 1967-1977 and two healthy Nigerians in the indigenous areas of Ibadan mainly children also teachers, food sellers and parents of the children   | 3.1 (360,000) and 4.6 (4,021) from group one and two, respectively                                    | Saline and iodine preparation from fresh stool samples, later formalin-ether concentration                                                                                             |
|                                                                     | Okafor and Azubike <sup>[173]</sup>                                                         | Nigeria, villagers from rural areas reporting at the parasitological laboratory                                                                                                                                                                   | 0.3 (300)                                                                                             | Formal-ether centrifugation                                                                                                                                                            |
|                                                                     | Pampiglione <i>et al.</i> <sup>[174]</sup>                                                  | Tanzania, Pemba island, collected from healthy population chosen at random                                                                                                                                                                        | 4.3 (392)                                                                                             | Modified Ritchie technique                                                                                                                                                             |

Contd...

Supplementary Table 1: Contd...

| Characteristics                                                        | Reference                                   | Country, region and study group                                                                                                                    | % prevalence (no. of samples examined)                                       | Methods                                                                                  |
|------------------------------------------------------------------------|---------------------------------------------|----------------------------------------------------------------------------------------------------------------------------------------------------|------------------------------------------------------------------------------|------------------------------------------------------------------------------------------|
|                                                                        | Pampiglione <i>et al.</i> <sup>[175]</sup>  | Sao Tome and Principe, collected from healthy population chosen at random                                                                          | 7.0 (1,050)                                                                  | Modified Ritchie technique                                                               |
| Characteristics                                                        | Prinz <i>et al.</i> <sup>[176]</sup>        | Northeast Zaire, Azande                                                                                                                            | 1.3 (165)                                                                    | NA                                                                                       |
|                                                                        | Reference                                   | Country, region and study group                                                                                                                    | % prevalence (no. of samples examined)                                       | Methods                                                                                  |
| Australia. From articles with patients or that are older than 20 years | Ashford and Atkinson <sup>[177]</sup>       | Papua New Guinea, Asaro Valley, sing-out sampling, points at sampling bias associated with this method                                             | 41 (995)                                                                     | Wet mount and iodine stained, gomori trichrome and safranin and methylene blue           |
|                                                                        | Sawangjaroen <i>et al.</i> <sup>[178]</sup> | Australia, Brisbane, non-hospital patients with diarrhoea                                                                                          | 1.2 (260)                                                                    | Unknown if found in routine microscopy or when culturing <i>D. fragilis</i>              |
|                                                                        | Stark <i>et al.</i> <sup>[179]</sup>        | Australia, Sydney, Three groups all patients with diarrhea: one homosexual men with HIV, two homosexual men without HIV and three heterosexual men | 10 (618), 12 (628) and 0.8 (622) from group one, two and three, respectively | One fecal sample from each, formalin-ethyl acetate concentration, iron-hematoxylin stain |

SUPPLEMENTARY REFERENCES

- Pérez Armengol C, Ariza Astolfi C, Ubeda Ontiveros JM, Guevara Benítez DC, de Rojas Alvarez M, Lozano Serrano C. [Epidemiology of children's intestinal parasitism in the Guadalquivir Valley, Spain]. *Rev Esp Salud Publica* 1997;71:547-52.
- Sagebiel D, Weitzel T, Stark K, Leitmeyer K. Giardiasis in kindergartens: Prevalence study in Berlin, Germany, 2006. *Parasitol Res* 2009;105:681-7.
- Schlosser O, Grall D, Laurenceau MN. Intestinal parasite carriage in workers exposed to sewage. *Eur J Epidemiol* 1999;15:261-5.
- Cerva L, Kliment V. Contribution to the problem of the so-called nonpathogenic amoebae in the intestine of man. *Folia Parasitol (Praha)* 1978;25:367-70.
- Chin AT, Gerken A. Carriage of intestinal protozoal cysts in homosexuals. *Br J Vener Dis* 1984;60:193-5.
- Jokipii L, Sargeant PG, Jokipii AM. Coincidence of deficient delayed hypersensitivity and intestinal protozoa in homosexual men. *Scand J Infect Dis* 1989;21:563-71.
- Portús M, Prats G. [Contribution to the knowledge of intestinal protozoa infestation in the hospital population of Barcelona (author's transl)]. *Med Clin (Barc)* 1981;76:203-5.
- Soriano JM, Domènech G, Martínez MC, Mañes J, Soriano F. Intestinal parasitic infections in hosted Saharawi children. *Trop Biomed*. 2011;28:557-62.
- Stěrba J, Ditrich O, Prokopic J, Kadlcik K. Gastrointestinal parasitoses discovered in agricultural workers in South Bohemia, Czechoslovakia. *Folia Parasitol (Praha)* 1988;35:169-73.
- Stürchler D, Peter R. [Parasitic disease in schoolchildren in a village in Swiss Jura]. *Soz Praventivmed* 1981;26:317-9.
- Aimpun P, Hshieh P. Survey for intestinal parasites in Belize, Central America. *Southeast Asian J Trop Med Public Health* 2004;35:506-11.
- Faulkner CT, Garcia BB, Logan MH, New JC, Patton S. Prevalence of endoparasitic infection in children and its relation with cholera prevention efforts in Mexico. *Rev Panam Salud Publica* 2003;14:31-41.
- Kurup R, Hunjan GS. Epidemiology and control of Schistosomiasis and other intestinal parasitic infections among school children in three rural villages of south Saint Lucia. *J Vector Borne Dis* 2010;47:228-34.
- Mendoza D, Núñez FA, Escobedo A, Pelayo L, Fernández M, Torres D, *et al.* [Intestinal parasitic infections in 4 child day-care centers located in San Miguel del Padrón municipality, Havana City, 1998]. *Rev Cubana Med Trop* 2001;53:189-93.
- Acuna-Soto R, Samuelson J, De Girolami P, Zarate L, Millan-Velasco F, Schoolnick G, *et al.* Application of the polymerase chain reaction to the epidemiology of pathogenic and nonpathogenic *Entamoeba histolytica*. *Am J Trop Med Hyg* 1993;48:58-70.
- Barrett DM, Steel-Duncan J, Christie CD, Eldemire-Shearer D, Lindo JF. Absence of opportunistic parasitic infestations in children living with HIV/AIDS in children's homes in Jamaica: pilot investigations. *West Indian Med J* 2008;57:253-6.
- Bruckner DA, Garcia LS, Voge M. Intestinal parasites in Los Angeles, California. *Am J Med Technol* 1979;45:1020-2.
- Church C, Neill A, Schotthoefer AM. Intestinal infections in humans in the Rocky Mountain region, United States. *J Parasitol* 2010;96:194-6.
- Church DL, Sutherland LR, Gill MJ, Visser ND, Kelly JK. Absence of an association between enteric parasites in the manifestations and pathogenesis of HIV enteropathy in gay men. The GI/HIV Study Group. *Scand J Infect Dis* 1992;24:567-75.
- Edouard A, Edouard S, Desbois N, Plumelle Y, Rat C, Calès-Quist D, *et al.* [Evolution in the prevalence of intestinal parasitosis in the Fort de France University Hospital (Martinique)]. *Presse Med* 2004;33:707-9.
- Elliott S, Long EG, Truant AL, Smith JH. Parasitic infections encountered on the Texas Gulf Coast. *Tex Med* 1981;77:45-6.
- Haddad CG, Agrawal N. Gastrointestinal parasitic infection: an overlooked entity. *South Med J* 1982;75:778-9. PubMed PMID: 7089641.
- Kabani A, Cadrain G, Trevenen C, Jadavji T, Church DL. Practice guidelines for ordering stool ova and parasite testing in a pediatric population. The Alberta Children's Hospital. *Am J Clin Pathol* 1995;104:272-8.
- Kappus KK, Juranek DD, Roberts JM. Results of testing for intestinal parasites by state diagnostic laboratories, United States, 1987. *MMWR CDC Surveill Summ* 1991;40:25-45.
- Peters C, Kocka F, Chittom A, Sable R, Janda W. High Carriage of *Endolimax-Nana* In Diarrheal Specimens From Homosexual Men. *Letters in Applied Microbiology* 1987;5:65-6.

26. Ramírez-Miranda ME, Jiménez-González DE, Rodríguez-Campa ME, González-Angulo A, Hernández-Castellanos R, Sara Arroyo-Escalante A, *et al.* [Irritable bowel syndrome: frequency and phylogenetic relationship of *Blastocystis* sp. from Mexican patients]. *Rev Gastroenterol Mex* 2011;76:309-15.
27. Ribes JA, Seabolt JP, Overman SB. Point prevalence of *Cryptosporidium*, *Cyclospora*, and *Isoospora* infections in patients being evaluated for diarrhea. *Am J Clin Pathol* 2004;122:28-32.
28. Robinson RD, Murphy EL, Wilks RJ, Neva FA, Terry SI, Hanchard B, *et al.* Gastrointestinal parasitic infection in healthy Jamaican carriers of HTLV-I. *J Trop Med Hyg* 1991;94:411-5.
29. Rojas CL, Angel Núñez CF, Aguiar PH, Silva Ayçaguer CL, Alvarez D, Martínez R, *et al.* [Second national survey of intestinal parasitic infections in Cuba, 2009]. *Rev Cubana Med Trop* 2012;64:15-21.
30. Tsaihong JC, Liou MY, Ma PC. Enteric parasites and antibodies to human immunodeficiency virus in homosexual men with diarrhea. *Gaoxiong Yi Xue Ke Xue Za Zhi* 1993;9:567-71.
31. Ungar BL, Iscoe E, Cutler J, Bartlett JG. Intestinal parasites in a migrant farmworker population. *Arch Intern Med* 1986;146:513-5.
32. Wilkins R, Horner N. Human Intestinal Parasitosis In Northern Chihuahua, Mexico. *Texas Journal of Science* 1991;43:81-9.
33. Yamamoto-Furusho JK, Torijano-Carrera E. Intestinal protozoa infections among patients with ulcerative colitis: Prevalence and impact on clinical disease course. *Digestion* 2010;82:18-23.
34. Acurero E, Avila A, Rangel L, Calchi M, Grimaldos R, Cotiz M. Intestinal Protozoa in School Children at Public and Private Institutions in the Maracaibo Municipality, State of Zulia. *Kasmera* 2013;41:50-8.
35. Alves JR, Macedo HW, Ramos AN, Ferreira LF, Gonçalves ML, Araújo A. [Intestinal parasite infections in a semiarid area of Northeast Brazil: Preliminary findings differ from expected prevalence rates]. *Cad Saude Publica* 2003;19:667-70.
36. Assis EM, Oliviera RC, Moreira LE, Pena JL, Rodrigues LC, Machado-Coelho GL. [Prevalence of intestinal parasites in the Maxakali indigenous community in Minas Gerais, Brazil, 2009]. *Cad Saude Publica* 2013;29:681-90.
37. Berbert-Ferreira M, Costa-Cruz JM. [Intestinal parasites in children aged 4-12 months attending day-care centers of Federal University-Uberlândia-MG]. *J Pediatr (Rio J)* 1995;71:219-22.
38. Bermúdez A, Flórez O, Bolaños MV, Medina JJ, Salcedo-Cifuentes M. [Enteroparasitism, hygiene and environmental sanitation in under-aged from six indigenous communities. Cali-Colombia]. *Rev Salud Publica (Bogota)* 2013;15:1-11.
39. Biscegli T, Romera J, Candido A, Santos J, Candido E, Binotto A. Nutritional status and enteroparasitosis prevalence among children enrolled in a day care center. *Rev Paul Pediatr*; 2009. p. 289-95.
40. Braccialeforte R, Diaz M, Pivetta V, Burstein V, Varengo H, Orsilles M. Enteroparasites in children and adolescents of a periurban community in the province of Cordoba. *Acta Bioquímica Clínica Latinoamericana* 2010;44:353-8.
41. Castro ED, Germini MC, Mascarenhas JD, Gabbay YB, de Lima IC, Lobo PoS, *et al.* Enteropathogens detected in a daycare center, Southeastern Brazil: bacteria, virus, and parasite research. *Rev Inst Med Trop Sao Paulo*. 2015;57:27-32.
42. Damazio SM, Lima MeS, Soares AR, Souza MA. Intestinal parasites in a quilombola community of the Northern State of Espírito Santo, Brazil. *Rev Inst Med Trop Sao Paulo* 2013;55.
43. Maco Flores V, Marcos Raymundo LA, Terashima Iwashita A, Samalvides Cuba F, Gotuzzo Herencia E. [Distribution of entero-parasitic infections in the Peruvian Highland: Study carried out in six rural communities of the department of Puno, Peru]. *Rev Gastroenterol Peru* 2002;22:304-9.
44. Franke MF, Del Castillo H, Pereda Y, Lecca L, Fuertes J, Cárdenas L, *et al.* Parasite infection and tuberculosis disease among children: A case-control study. *Am J Trop Med Hyg* 2014;90:279-82.
45. Freitas A, Colmenares D, Pérez M, García M, Díaz de Suárez O. [Cryptosporidium sp infections and other intestinal parasites in food handlers from Zulia state, Venezuela]. *Invest Clin* 2009;50:13-21.
46. Ibanez H, Jara C, Guerra M, Diaz L. Prevalencia del enteroparasitismo en escolares de comunidades nativas del alto Marañon, Amazonas, Peru *Rev Peru Med Exp Salud Publica*; 2004. p. 126-33.
47. Kobayashi J, Hasegawa H, Forli AA, Nishimura NF, Yamanaka A, Shimabukuro T, *et al.* Prevalence of intestinal parasitic infection in five farms in Holambra, São Paulo, Brazil. *Rev Inst Med Trop Sao Paulo*. 1995;37:13-8.
48. Korkes F, Kumagai FU, Belfort RN, Szejnfeld D, Abud TG, Kleinman A, *et al.* Relationship between intestinal parasitic infection in children and soil contamination in an urban slum. *J Trop Pediatr* 2009;55:42-5.
49. Laugart E, Garcia F, Nunez C, Pena M, Fundora I, Medina R. Aspects on children epidemiology of intestinal parasites in Vegon Nutrias, Venezuela. *Revista Cubana de Higiene y Epidemiologia*; 2012. p. 330-9.
50. Machado E, Santos D, Costa-Cruz J. Enteroparasites and commensals among children in four peripheral districts of Uberlândia, State of Minas Gerais. *Sociedade Brasileira De Medicina Tropical* 2008;41:581-5.
51. Mercado R, Otto JP, Musleh M, Pérez M. [Human infection by intestinal protozoa and helminths in Calbuco County, X Region, Chile, 1997]. *Bol Chil Parasitol* 1997;52:36-8.
52. Milano AM, Oscherov EB, Palladino AC, Bar AR. [Children enteroparasitosis in north east Argentine urban area]. *Medicina (B Aires)* 2007;67:238-42.
53. Mora L, Martínez I, Figuera L, Segura M, Del Valle G. [Protozoans in superficial waters and faecal samples of individuals of rural populations of the Montes municipality, Sucre state, Venezuela]. *Invest Clin* 2010;51:457-66.
54. Moura EC, Bragazza LM, Coelho MF, Aun SM. [Prevalence of intestinal parasitosis in schoolchildren]. *J Pediatr (Rio J)* 1997;73:406-10.
55. Muñoz-Antoli C, Pavon A, Marcilla A, Toledo R, Esteban J. Prevalence and risk factors related to intestinal parasites among children in Department of Rio San Juan, Nicaragua. *Transactions of the Royal Society of Tropical Medicine and Hygiene* 2014;108:774-82.
56. Nascimento SA, Moitinho MaL. Blastocystis hominis and other intestinal parasites in a community of Pitanga City, Paraná State, Brazil. *Rev Inst Med Trop Sao Paulo* 2005;47:213-7.

57. Rios L, Cutolo S, Giatti L, Castro M, Rocha A, Toledo R, *et al.* Prevalence of intestinal parasites and social-environmental aspects in an indigenous community in the laurere district, municipality of Sao Gabriel da Cachoeira (AM), Brasil. *Saude Soc Sao Paulo*; 2007. p. 76-86.
58. Rivero-Rodríguez Z, Chourio-Lozano G, Diaz I, Cheng R, Rucsón G. [Intestinal parasites in school children at a public institution in Maracaibo municipality, Venezuela]. *Invest Clin* 2000;41:37-57.
59. Saldiva SR, Silveira AS, Philippi ST, Torres DM, Mangini AC, Dias RM, *et al.* Ascaris-Trichuris association and malnutrition in Brazilian children. *Paediatr Perinat Epidemiol* 1999;13:89-98.
60. Santos SA, Merlini LS. [Prevalence of enteroparasitosis in the population of Maria Helena, Paraná State]. *Cien Saude Colet* 2010;15:899-905.
61. Silva L, da Silva E, da Silva R. Parasitological diagnosis of horticulturist in monitoring parasitic contamination in rural environments. *Bioscience Journal* 2010;26:648-52.
62. Tabares L, Gonzalez L. Prevalence of intestinal parasites in children under 12 years of age, hygienic habits, characteristics of the houses and presence of bacteria in the drinking water of a locality of Sabaneta, Columbia. *Iatreia* 2008;21:253-9.
63. Takizawa M, Falavigna DL, Gomes ML. Enteroparasitosis and their ethnographic relationship to food handlers in a tourist and economic center in Paraná, Southern Brazil. *Rev Inst Med Trop Sao Paulo* 2009;51:31-5.
64. Tashimi N, Simoes M, Leite C, Fluminhan A, Nogueira M, Malaspina A. Classic and molecular study of *Giardia duodenalis* in children from a daycare center in the region of presidente prudente, Sao Paulo, Brazil *Rev Inst Med trop S Paulo*; 2009. p. 19-24.
65. Amancio F, Pascotto V, Souza L, Calvi S, Pereira P. Intestinal parasitic infections in HIV/AIDS patients: Epidemiological, nutritional and immunological aspects. *Journal of Venomous Animals and Toxins Including Tropical Diseases* 2012;18:225-35.
66. Bourée P, David P, Basset D, Coco O, Beauvais B, David-Julien MC, *et al.* [Epidemiologic survey of intestinal parasitoses in Peruvian Amazonia]. *Bull Soc Pathol Exot Filiales* 1984;77:690-8.
67. Cancrini G, Bartoloni A, Nuñez L, Paradisi F. Intestinal parasites in the Camiri, Gutierrez and Boyuibe areas, Santa Cruz Department, Bolivia. *Parassitologia* 1988;30:263-9.
68. Carvalho-Costa FA, Gonçalves AQ, Lassance SL, de Albuquerque CP, Leite JP, Bóia MN. Detection of *Cryptosporidium* spp and other intestinal parasites in children with acute diarrhea and severe dehydration in Rio de Janeiro *Rev Soc Bras Med Trop* 2007;40:346-8.
69. Cho SY, Kim JH, Park SH. Status of intestinal parasite infections in inhabitants of Palmar, Guayas Province, Ecuador. *Kisaengchunghak Chapchi* 1990;28:109-13.
70. Cimerman S, Cimerman B, Lewi DS. Prevalence of intestinal parasitic infections in patients with acquired immunodeficiency syndrome in Brazil. *Int J Infect Dis* 1999;3:203-6.
71. Garibaldi R, Muñoz N, Neira P, Subercaseaux B, Villalón L. [Intestinal parasites and ectoparasites in the V region, Chile: study in the Psychiatric Hospital of Putaendo]. *Bol Chil Parasitol.* 1990;45(3-4):83-5. [PubMed PMID: 2152365](#).
72. Goldin AJ, Apt W, Aguilera X, Zulantay I, Warhurst DC, Miles MA. Efficient diagnosis of giardiasis among nursery and primary school children in Santiago, Chile by capture ELISA for the detection of fecal *Giardia* antigens. *Am J Trop Med Hyg* 1990;42:538-45.
73. Guignard S, Arienti H, Freyre L, Lujan H, Rubinstein H. Prevalence of enteroparasites in a residence for children in the Córdoba Province, Argentina. *Eur J Epidemiol* 2000;16:287-93.
74. Kulik RA, Falavigna DL, Nishi L, Araujo SM. Blastocystis sp. and other intestinal parasites in hemodialysis patients. *Braz J Infect Dis* 2008;12:338-41.
75. Maia MM, Fausto MA, Vieira EL, Benetton ML, Carneiro M. Intestinal parasitic infection and associated risk factors, among children presenting at outpatient clinics in Manaus, Amazonas state, Brazil. *Ann Trop Med Parasitol* 2009;103:583-91.
76. Merlano N, Falconar A, Solano H, Vivas C. Clinical manifestations and risk factors associated with *Cryptosporidium* spp. infections in patients from Barranquilla and three "municipios" of Atlantico (Columbia). *Salud Uninorte Barranquilla*; 2007. p. 19-31.
77. Moura H, Fernandes O, Viola JP, Silva SP, Passos RH, Lima DB. Enteric parasites and HIV infection: occurrence in AIDS patients in Rio de Janeiro, Brazil. *Mem Inst Oswaldo Cruz.* 1989;84:527-33.
78. Navarrete N, Torres P. [Prevalence of infection by intestinal helminths and protozoa in school children from a coastal locality in the province of Valdivia, Chile]. *Bol Chil Parasitol* 1994;49:79-80.
79. Rivero-Rodríguez Z, Hernández A, Bracho Á, Salazar S, Villalobos R. [Prevalence of intestinal microsporidia and other intestinal parasites in hiv positive patients from Maracaibo, Venezuela]. *Biomedica* 2013;33:538-45.
80. Silva L, da Silva R, Fernandes N, de Oliveira J. Parasitic And Intestinal Commensals In The Neoplastic Patients Undergoing Chemotherapy. *Bioscience Journal* 2011;27:170-7.
81. Torres P, Miranda JC, Flores L, Riquelme J, Franjola R, Pérez J, *et al.* [Blastocystosis and other intestinal protozoan infections in human riverside communities of the Valdivia River basin, Chile]. *Rev Inst Med Trop Sao Paulo* 1992;34:557-64.
82. Urbina D, Arzuza O, Young G, Parra E, Castro R, Puello M. Rotavirus type A and other enteric pathogens in stool samples from children with acute diarrhea on the Colombian northern coast. *Int Microbiol* 2003;6:27-32.
83. Valles L, Mieses M, Agobian G. Predominance of *Blastocystis hominis* over other enteroparasites in patients from Palavecino municipality, State of Lara, Venezuela; *Rev Cubana Med Trop*; 2006. p. 14-8.
84. Vidal S, Toloza L, Cancino B. [Evolution of the prevalence the enteroparasitoses in Talca-Chile]. *Rev Chilena Infectol* 2010;27:336-40.
85. Abdel-Dayem M, Al Zou'bi R, Hani RB, Amr ZS. Microbiological and parasitological investigation among food handlers in hotels in the Dead Sea area, Jordan; *J Microbiol Immunol Infect* 2014;47:377-80.
86. Akdemir C, Helvacı R. [Evaluation of parasitological laboratory results of a group of people older than 15 years of age in Kutahya]. *Turkiye Parazitoloj Derg* 2007;31:37-40.
87. Amin AM. Blastocystis hominis among apparently healthy food handlers in Jeddah, Saudi Arabia. *J Egypt Soc Parasitol* 1997;27:817-23.
88. Azian M, San Y, Gan C, Yusri M, Nurulsyamzawaty Y, Zuhairn A, *et al.* Prevalence of intestinal protozoa in an aborigine community in Pahang, Malaysia; *Tropical Biomedicine* 2007;24:55-62.



89. Ben-Shimol S, Sagi O, Greenberg D. Differences in prevalence of parasites in stool samples between three distinct ethnic pediatric populations in southern Israel, 2007-2011. *Parasitol Int* 2014;63:456-62.
90. Börekçi G, Uzel A. [The determination of intestinal parasites, physical growth and hygiene behaviors of children in the Mersin City Social Service Child Care Centre]. *Türkiye Parazitol Derg* 2009;33:63-72.
91. Taş Cengiz Z, Çiçek M, Akbayram S, Yılmaz H. [Intestinal parasites detected in Süphan Primary schoolchildren in Van]. *Türkiye Parazitol Derg* 2009;33:294-7.
92. Taş Cengiz Z, Akbayram S, Çiçek M, Yılmaz H. [Intestinal parasites detected in primary schoolchildren in the Van province]. *Türkiye Parazitol Derg* 2009;33:289-93.
93. Danchaivijitr S, Rongrungruang Y, Kachintorn U, Techasathit V, Pakaworavuthi S, Kachintorn K. Prevalence and effectiveness of an education program on intestinal pathogens in food handlers. *J Med Assoc Thai* 2005;88 Suppl 10:S31-5.
94. Daryani A, Sharif M, Nasrolahei M, Khalilian A, Mohammadi A, Barzegar G. Epidemiological survey of the prevalence of intestinal parasites among schoolchildren in Sari, northern Iran. *Trans R Soc Trop Med Hyg* 2012;106:455-9.
95. Değerli S, Celiksöz A, Aslan A, Aciöz M, Özçelik S. [Comparison of the results of examination of fecal samples from students at six months intervals in the Alahaci village primary school in Sivas]. *Türkiye Parazitol Derg*. 2006;30:305-7.
96. Güdücüoğlu H, Parlak M, Çiçek M, Yaman G, Öztürk O, Cıkman A, *et al*. [Investigation of intestinal parasites in students of Mustafa Cengiz primary school in Van]. *Türkiye Parazitol Derg* 2010;34:172-5.
97. Hamamcı B, Cetinkaya U, Delice S, Erçal BD, Gücüyemez S, Yazar S. [Investigation of intestinal parasites among primary school students in Kayseri-Hacılar]. *Türkiye Parazitol Derg* 2011;35:96-9.
98. Kia E, Hosseini M, Nilforoushan M, Meamar A, Rezaeian M. Study of intestinal protozoan parasites in rural inhabitants of Mazandaran Province, northern Iran. *Iranian Journal of Parasitology* 2008;3:21-5.
99. Kitvatanachai S, Rhongbutsri P. Intestinal parasitic infections in suburban government schools, Lak Hok subdistrict, Muang Pathum Thani, Thailand. *Asian Pac J Trop Med* 2013;6:699-702.
100. Koshak EA, Zakai HA. A spectrum of pathogenic and non-pathogenic intestinal parasites in pre-employment medical check-up for workers and their families. *J Family Community Med* 2003;10:47-53.
101. Kurtoglu MG, Korkoca H, Çiçek M, Cengiz ZT. [Prevalence of intestinal parasites among workers in food sector in Van region]. *Türkiye Parazitol Derg* 2007;31:309-12.
102. Lee KJ, Ahn YK, Yong TS. A small-scale survey of intestinal parasite infections among children and adolescents in Legaspi city, the Philippines. *Korean J Parasitol* 2000;38:183-5.
103. Lu CT, Sung YJ. Epidemiology of *Blastocystis hominis* and other intestinal parasites among the immigrant population in northeastern Taiwan by routine physical examination for residence approval. *J Microbiol Immunol Infect* 2009;42:505-9.
104. Ngrenngarmert W, Lamom C, Pasuralertsakul S, Yaicharoen R, Wongjindanon N, SriPOCHANG S, *et al*. Intestinal parasitic infections among school children in Thailand. *Tropical Biomedicine* 2007;24:83-8.
105. Oyofoba BA, Subekti D, Tjaniadi P, Machpud N, Komalarini S, Setiawan B, *et al*. Enteropathogens associated with acute diarrhea in community and hospital patients in Jakarta, Indonesia; *FEMS Immunol Med Microbiol* 2002;34:139-46.
106. Prownebon J, Charupoonphol P, Saksirisampant P, Limvorapitak T, Seepongpun U, Saksirisampant W. Intestinal parasitic infections: high prevalence of *Giardia intestinalis* in children living in an orphanage compared with hill-tribe children as detected by microscopy and ELISA. *Asian Biomedicine* 2013;7:855-63.
107. Sagnuankiat S, Wanichsuwan M, Bhunnachet E, Jungarat N, Panraksa K, Komalamisra C, *et al*. Health Status of Immigrant Children and Environmental Survey of Child Daycare Centers in Samut Sakhon Province, Thailand; *J Immigr Minor Health* 2014.
108. Saksirisampant W, Nuchprayoon S, Wiwanitkit V, Yenthakam S, Ampavasiri A. Intestinal parasitic infestations among children in an orphanage in Pathum Thani province. *J Med Assoc Thai* 2003;86 Suppl 2:S263-70.
109. Saksirisampant W, Prownebon J, Kanmarnee P, Thaisom S, Yenthakam S, Nuchprayoon S. Prevalence of parasitism among students of the Karen hill-tribe in Mae Chame district, Chiang Mai province, Thailand; *J Med Assoc Thai* 2004;87 Suppl 2:S278-83.
110. Saksirisampant W, Prownebon J, Kulkumthorn M, Yenthakam S, Janpla S, Nuchprayoon S. Prevalence of intestinal parasitic infections among school children in the central region of Thailand; *J Med Assoc Thai* 2006;89:1928-33.
111. Tungtrongchitr A, Manatsathit S, Kositchaiwat C, Ongrotchanakun J, Munkong N, Chinabutr P, *et al*. *Blastocystis hominis* infection in irritable bowel syndrome patients. *Southeast Asian J Trop Med Public Health* 2004;35:705-10.
112. Tungtrongchitr A, Chiworaporn C, Praewanich R, Radomyos P, Boitano JJ. The potential usefulness of the modified Kato thick smear technique in the detection of intestinal sarcocystosis during field surveys. *Southeast Asian J Trop Med Public Health* 2007;38:232-8.
113. Waikagul J, Krudsood S, Radomyos P, Radomyos B, Chalemrut K, Jonsuksuntigul P, *et al*. A cross-sectional study of intestinal parasitic infections among schoolchildren in Nan Province, Northern Thailand. *Southeast Asian J Trop Med Public Health*. 2002;33:218-23.
114. Warunee N, Choomanee L, Sataporn P, Rapeeporn Y, Nuttpong W, Sompong S, *et al*. Intestinal parasitic infections among school children in Thailand *Trop Biomed* 2007;24:83-8.
115. Wilairatana P, Radomyos P, Radomyos B, Phraevanich R, Plooksawasdi W, Chanthavanich P, *et al*. Intestinal sarcocystosis in Thai laborers; *Southeast Asian J Trop Med Public Health* 1996;27:43-6.
116. Wongjindanon N, Suksrichavalit T, Subutti W, Sarachart T, Worapisuttiwong U, Norramatha P. Current infection rate of *Giardia lamblia* in two provinces of Thailand; *Southeast Asian J Trop Med Public Health* 2005;36 Suppl 4:21-5.
117. Yaicharoen R, SriPOCHANG S, Sermsart B, Pidetcha P. Prevalence of *Blastocystis hominis* infection in asymptomatic individuals from Bangkok, Thailand. *Southeast Asian J Trop Med Public Health* 2005;36 Suppl 4:17-20.
118. Yaicharoen R, Ngrenngarmert W, Wongjindanon N, SriPOCHANG S, Kiatfuengfoo R. Infection of *Blastocystis hominis* in primary schoolchildren from Nakhon Pathom

- province, Thailand; Trop Biomed 2006;23:117-22.
119. Akao N, Ohyama T, Ohkawa T, Kondo K, Hirokawa Y, Ito S, *et al.* [A survey of intestinal parasites of the foreign laborers (Indonesians and Filipinos) in Ishikawa Prefecture]. *Kansenshogaku Zasshi*. 1992;66:1256-61.
  120. Akhlaghi L, Shamseddin J, Meamar A, Razmjou E, Oormazdi H. Frequency of Intestinal Parasites in Tehran. *Iranian Journal of Parasitology*. 2009;4:44-7.
  121. Arslan MO, Sari B, Kulu B, Mor N. [The prevalence of intestinal parasites in children brought to the Kars Maternal and Children's Hospital with complaints of gastrointestinal symptoms]. *Turkiye Parazit Derg* 2008;32:253-6.
  122. Azami M, Sharifi M, Hejazi SH, Tazhibi M. Intestinal parasitic infections in renal transplant recipients. *Braz J Infect Dis* 2010;14:15-8.
  123. Carney WP, Van Peenen PF, See R, Hagelstein E, Lima B. Parasites of man in remote areas of Central and South Sulawesi, Indonesia; *Southeast Asian J Trop Med Public Health* 1977;8:380-9.
  124. Carney WP, Banzon T, De Veyra V, Daña E, Cross JH. Intestinal parasites of man in Northern Bohol, Philippines, with emphasis on schistosomiasis. *Southeast Asian J Trop Med Public Health* 1980;11:473-9.
  125. Carney WP, de Veyra VU, Cala EM, Cross JH. Intestinal parasites of man in Bukidnon, Philippines, with emphasis on schistosomiasis. *Southeast Asian J Trop Med Public Health* 1981;12:24-9.
  126. Carney WP, Banzon T, de Veyra V, Papasin MC, Cross JH. Intestinal parasites of man in Oriental Mindoro, Philippines, with emphasis on schistosomiasis. *Southeast Asian J Trop Med Public Health* 1981;12:12-8.
  127. Chiu JK, Chiu PC, Tseng PT. Prevalence of intestinal parasitic infections among inhabitants of Tan-nan village, Nantou County, Taiwan. *Zhonghua Min Guo Wei Sheng Wu Xue Za Zhi* 1979;12:155-9.
  128. Choi SC, Lee SY, Song HO, Ryu JS, Ahn MH. Parasitic infections based on 320 clinical samples submitted to Hanyang University, Korea (2004-2011). *Korean J Parasitol* 2014;52:215-20.
  129. Kim CH, Na YE, Kim NM, Shin DW, Chang DY. [Intestinal parasite and *Clonorchis sinensis* infection among the inhabitants in the upper stream of Taechong Dam, Kungang (River)]. *Korean J Parasitol* 1994;32:207-14.
  130. Cross JH, Clarke MD, Cole WC, Lien JC, Partono F, Djakaria, *et al.* Parasitic infections in humans in West Kalimantan (Borneo), Indonesia; *Trop Geogr Med* 1976;28:121-30.
  131. Cross JH, Clarke MD, Cole WC, Lien JC, Partono F, Joesoef A, *et al.* Parasitology survey in northern Sumatra, Indonesia. *J Trop Med Hyg* 1976;79:123-31.
  132. Cross JH, Banzon T, Wheeling CH, Cometa H, Lien JC, Clarke R, *et al.* Biomedical survey in North Samar Province, Philippine Islands. *Southeast Asian J Trop Med Public Health* 1977;8:464-75.
  133. Cross JH, Irving GS, Anderson KE, Gunawan S, Saroso JS. Biomedical survey in Irian Jaya (West Irian), Indonesia. *Southeast Asian J Trop Med Public Health* 1977;8:532-6.
  134. Doğan N, Oz Y, Koçman NU, Nursal AF. [Comparison of individual differences in the direct microscopic examination in the diagnosis of intestinal parasites]. *Turkiye Parazit Derg* 2012;36:211-4.
  135. Goo GS, Min DY, Ahn MH, Kim KM, Leem MH, Yoon HS. Status of intestinal parasitic infections in a remote island, Yondo, Jeonranam-do: Province. *Kisaengchunghak Chapchi* 1988;26:275-84.
  136. Hong SJ, Hong ST, Chai JY, Lee SH, Seo BS, Cho SH, *et al.* [A Survey On The Prevalence Of Intestinal Protozoan Cysts In Jeonlanam Do, Korea]. *Kisaengchunghak Chapchi* 1982;20:43-8.
  137. Hong ST. [A survey on intestinal parasites of soldiers in Korea]. *Kisaengchunghak Chapchi* 1986;24:213-5.
  138. Iqbal J, Hira PR, Al-Ali F, Philip R. Cryptosporidiosis in Kuwaiti children: Seasonality and endemicity. *Clin Microbiol Infect* 2001;7:261-6.
  139. Kim JH, Yoon JJ, Lee SH, Seo BS. Parasitological Studies Of Korean Forces In South Vietnam: II. A Comparative Study On The Incidences Of Intestinal Parasites. *Kisaengchunghak Chapchi* 1970;8:30-5.
  140. Kim CH, Park CH, Kim HJ, Chun HB, Min HK, Koh TY, *et al.* [Prevalence Of Intestinal Parasites In Korea]. *Kisaengchunghak Chapchi* 1971;9:25-38.
  141. Kim SC, Kim JJ, Lee KT. [Epidemiological Studies On Protozoan Infection In Gyeong-Gi Do And Jeonra Bug Do]. *Kisaengchunghak Chapchi*. 1984;22:116-26.
  142. Kim H, Lee J, Choi Y, Kim J, Son H, Rhee P, *et al.* Examination of helminth eggs and protozoan cysts in fecal samples from healthy Korean adults, 2000~2006. *The Korean Journal of Medicine* 2009. p. 741-9.
  143. Kim Y, Huh H, Hwang Y, Lee N. A survey of intestinal parasite infection during a 10-year period (2003-2012). *Ann Clin Microbiol*; 2013. p. 134-9.
  144. Lee R, Cross JH, Irving GS, Lane C, Watten RH. Surveillance of some infectious diseases among aircrew personnel in Southeast Asia. *Aviat Space Environ Med* 1975;46:1152-4.
  145. Lee SK, Shin BM, Chung NS, Chai JY, Lee SH. [Second report on intestinal parasites among the patients of Seoul Paik Hospital (1984-1992)]. *Korean J Parasitol* 1994;32:27-33.
  146. Lee J, Park GM, Lee DH, Park SJ, Yong TS. Intestinal parasite infections at an institution for the handicapped in Korea. *Korean J Parasitol* 2000;38:179-81.
  147. Mangali A, Sasabone P, Syafruddin, Abadi K, Hasegawa H, Toma T, *et al.* Intestinal parasitic infections in Campalagian district, south Sulawesi, Indonesia. *Southeast Asian J Trop Med Public Health* 1993;24:313-20.
  148. Nasiri V, Esmailnia K, Karim G, Nasir M, Akhavan O. Intestinal parasitic infections among inhabitants of Karaj City, Tehran province, Iran in 2006-2008. *Korean J Parasitol* 2009;47:265-8.
  149. Niyayati M, Rezaeian M, Zahabion F, Hajarzadeh R, Kia E. A Survey On Intestinal Parasitic Infections In Patients Referred To A Hospital In Tehran. *Pakistan Journal of Medical Sciences* 2009;25:87-90.
  150. Purnomo, Partono F, Soewarta A. Human intestinal parasites in Karakuak, West Flores, Indonesia and the effect of treatment with mebendazole and pyrantel pamoate. *Southeast Asian J Trop Med Public Health*. 1980;11:324-31.
  151. Sahin I, Kiliç H, Ozcan M, Orhan R. [A copro-parasitological study on the wrestlers of the national team]. *Mikrobiyol Bul* 1984;18:114-8.
  152. Sharif M, Daryani A, Asgarian F, Nasrolahei M. Intestinal parasitic infections among intellectual disability children in rehabilitation centers of northern Iran. *Res Dev Disabil* 2010;31:924-8.
  153. Shokri A, Sarasiabi KS, Teshnizi SH, Mahmoodi H. Prevalence of *Strongyloides stercoralis* and other intestinal parasitic infections among mentally retarded



- residents in central institution of southern Iran. *Asian Pac J Trop Biomed* 2012;2:88-91.
154. Stafford EE, Joesoef A. Intestinal and blood parasites of man in Bireuen and Takengon, Aceh Province, Sumatra, Indonesia. *Southeast Asian J Trop Med Public Health* 1976;7:518-22.
  155. Stafford EE, Masri S, Sorensen K. Parasitological survey in Gorontalo North Sulawesi, Indonesia. *Southeast Asian J Trop Med Public Health* 1976;7:405-10.
  156. Stafford EE, Sudomo M, Masri S, Brown RJ. Human parasitoses in Bali, Indonesia. *Southeast Asian J Trop Med Public Health* 1980;11:319-23.
  157. Subbannayya K, Babu MH, Kumar A, Rao TS, Shivananda PG. *Entamoeba histolytica* and other parasitic infections in south Kanara district, Karnataka; *J Commun Dis* 1989;21:207-13.
  158. Supanaranond W, Migasena S, Pitisuttitham P, Suntharasamai P. Health status of Thai volunteers in a cholera vaccine trial. *J Med Assoc Thai* 1990;73:548-51.
  159. Tanyuksel M, Yilmaz H, Uluhanligil M, Araz E, Cicek M, Koru O, *et al*. Comparison of two methods (microscopy and enzyme-linked immunosorbent assay) for the diagnosis of amebiasis. *Exp Parasitol* 2005;110:322-6.
  160. Yaman O, Yazar S, Ozcan H, Cetinkaya U, Gözkeç N, Ateş S, *et al*. [Distribution of intestinal parasites in patients presenting at the parasitology laboratory of the medical school of Erciyes University between the years of 2005 and 2008]. *Turkiye Parazitoloj Derg* 2008;32:266-70.
  161. Yazar S, Yaman O, Gözkeç N, Sahin I. [Distribution of intestinal parasites among patients who presented at the Department of Parasitology of the Erciyes University Medical School.]. *Turkiye Parazitoloj Derg* 2005;29:261-3.
  162. Yosefi F, Randar M, Alavi S, Samany A. A study on Prevalence of Gastrointestinal Parasitic Infections in HIV (+) Patients Referred to Ahvaz Razi Hospital in 2008-2009. *Jundishapur Journal of Microbiology* 2012;5:424-6.
  163. Graczyk TK, Shiff CK, Tamang L, Munsaka F, Beitin AM, Moss WJ. The association of *Blastocystis hominis* and *Endolimax nana* with diarrheal stools in Zambian school-age children. *Parasitol Res* 2005;98:38-43.
  164. Ikeh EI, Obadofin MO, Brindeiro B, Baugherb C, Frost F, Vanderjagt D, *et al*. Intestinal parasitism in Magama Gumau rural village and Jos township in north central Nigeria. *Niger Postgrad Med J* 2007;14:290-5.
  165. Ouattara M, Silué KD, N'Guéssan AN, Yapi A, Barbara M, Raso G, *et al*. [Prevalence and polyparasitism of intestinal protozoa and spatial distribution of *Entamoeba histolytica*, *E. dispar* and *Giardia intestinalis* from pupils in the rural zone of Man in Côte d'Ivoire]. *Sante* 2008;18:215-22.
  166. Raso G, Utzinger J, Silué KD, Ouattara M, Yapi A, Toty A, *et al*. Disparities in parasitic infections, perceived ill health and access to health care among poorer and less poor schoolchildren of rural Côte d'Ivoire. *Trop Med Int Health* 2005;10:42-57.
  167. Chunge RN, Karumba PN, Nagelkerke N, Kaleli N, Wamwea M, Mutiso N, *et al*. Intestinal parasites in a rural community in Kenya: cross-sectional surveys with emphasis on prevalence, incidence, duration of infection, and polyparasitism. *East Afr Med J* 1991;68:112-23.
  168. El Shazly AM, Awad SE, Sultan DM, Sadek GS, Khalil HH, Morsy TA. Intestinal parasites in Dakahlia governorate, with different techniques in diagnosing protozoa. *J Egypt Soc Parasitol* 2006;36:1023-34.
  169. Goldsmid JM, Rogers S, Mahomed K. Observations on the intestinal protozoa infecting man in Rhodesia. *S Afr Med J* 1976;50:1547-50.
  170. Hunter G, Bagshawe AF, Baboo KS, Luke R, Prociw P. Intestinal parasites in Zambian patients with AIDS. *Trans R Soc Trop Med Hyg* 1992;86:543-5.
  171. Kasseem HH, Zaed HA, Sadaga GA. Intestinal parasitic infection among children and neonatus admitted to Ibn-Sina Hospital, Sirt, Libya; *J Egypt Soc Parasitol* 2007;37:371-80.
  172. Ogunba EO. The prevalence of human intestinal protozoa in Ibadan, Nigeria. *J Trop Med Hyg* 1977;80:187-91.
  173. Okafor CN, Azubike CN. Studies in intestinal parasitic disease agents in stools of people in a rural area of Nigeria. *West Afr J Med* 1992;11:106-11.
  174. Pampiglione S, Visconti S, Stefanini A. [Human intestinal parasites in Subsaharan Africa. III. Pemba Island (Zanzibar-Tanzania)]. *Parassitologia* 1987;29:27-35.
  175. Pampiglione S, Visconti S, Pezzino G. [Human intestinal parasites in Subsaharan Africa. II. Sao Tomé and Principe]. *Parassitologia* 1987;29:15-25.
  176. Prinz A, Hinrainer-Wilfing C, Renoldner K. [Parasitological results of a medico-anthropological research-work at the Azande in northeast-Zaire (author's transl)]. *Wien Med Wochenschr* 1979;129:674-8.
  177. Ashford RW, Atkinson EA. Epidemiology of *Blastocystis hominis* infection in Papua New Guinea: Age-prevalence and associations with other parasites. *Ann Trop Med Parasitol* 1992;86:129-36.
  178. Sawangjaroen N, Luke R, Prociw P. Diagnosis by faecal culture of *Dientamoeba fragilis* infections in Australian patients with diarrhoea. *Trans R Soc Trop Med Hyg* 1993;87:163-5.
  179. Stark D, Fotedar R, van Hal S, Beebe N, Marriott D, Ellis JT, *et al*. Prevalence of enteric protozoa in human immunodeficiency virus (HIV)-positive and HIV-negative men who have sex with men from Sydney, Australia. *Am J Trop Med Hyg* 2007;76:549-52.

### "Quick Response Code" link for full text articles

The journal issue has a unique new feature for reaching to the journal's website without typing a single letter. Each article on its first page has a "Quick Response Code". Using any mobile or other hand-held device with camera and GPRS/other internet source, one can reach to the full text of that particular article on the journal's website. Start a QR-code reading software (see list of free applications from <http://tinyurl.com/yzlh2tc>) and point the camera to the QR-code printed in the journal. It will automatically take you to the HTML full text of that article. One can also use a desktop or laptop with web camera for similar functionality. See <http://tinyurl.com/2bw7fn3> or <http://tinyurl.com/3ysr3me> for the free applications.
